# Supplementary material
Source: PubMed Central journal article supplement (PMC5607429)
Supplement: IAI.00193-17_zii999092173s1.pdf [file IAI.00193-17_zii999092173s1.pdf]

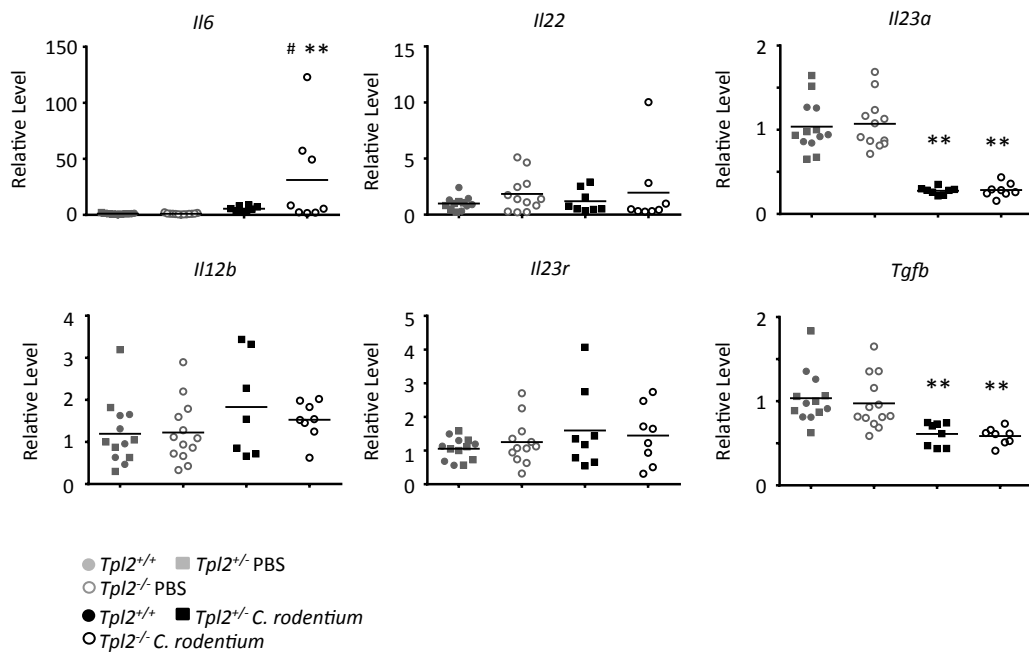

**FIG S1** Inflammatory cytokine expression in the colons of *C. rodentium* infected mice. Wild type ( $Tpl2^{+/+}$  and  $Tpl2^{+/-}$ ) and  $Tpl2^{-/-}$  mice were gavaged with  $2 \times 10^9$  CFU *C. rodentium* (ICC180). *Il6*, *Il22*, *Il23a*, *Il12b*, *Il23r*, and *Tgfb* expression was measure by RT-PCR on distal colons isolated from sham- or *C. rodentium*-infected mice at 11 dpi. Expression levels are relative to wild type controls.  $N \geq 8$ . Data are pooled from two or more independent experiments. # $p < 0.05$  compared to wild type 11 dpi, \*\*  $p < 0.005$  compared to sham-infected using one-way ANOVA.
